# Supplementary material for: Single-cell transcriptome analysis of epithelial, immune, and stromal signatures and interactions in human ovarian cancer
Source: PubMed Central journal article supplement (PMC10817929; doi:10.1038/s42003-024-05826-1), 2024-01-26
Supplement: 42003_2024_5826_MOESM2_ESM.pdf [file 42003_2024_5826_MOESM2_ESM.pdf]

---

1 **Supplementary Information**

2 **Single-cell transcriptome analysis of epithelial, immune, and stromal signatures**  
3 **and interactions in human ovarian cancer**

4  
5 Chaochao Chai<sup>1,2,3\*</sup>, Langchao Liang<sup>1,2,3\*</sup>, Nanna S. Mikkelsen<sup>4</sup>, Wei Wang<sup>5</sup>,  
6 Wandong Zhao<sup>1,2</sup>, Chengcheng Sun<sup>1,2</sup>, Rasmus O. Bak<sup>4</sup>, Hanbo Li<sup>2,3</sup>, Lin Lin<sup>4,6</sup>, Fei  
7 Wang<sup>2,3,4‡</sup>, Yonglun Luo<sup>2,3,4,6‡</sup>

8  
9 **Affiliations**

10 <sup>1</sup>College of Life Sciences, University of Chinese Academy of Sciences, Beijing 10049,  
11 China.

12 <sup>2</sup>Lars Bolund Institute of Regenerative Medicine Qingdao-Europe Advanced Institute  
13 for LifeScience, BGI Research, Qingdao 266555, China.

14 <sup>3</sup>BGI Research, Shenzhen 518083, China.

15 <sup>4</sup>Department of Biomedicine, Aarhus University, Aarhus, Denmark.

16 <sup>5</sup>Department of Obstetrics and Gynecology, Tongji Hospital, Tongji Medical College,  
17 Huazhong University of Science and Technology, Wuhan, China.

18 <sup>6</sup>Steno Diabetes Center Aarhus, Aarhus University Hospital, Aarhus, Denmark.

19 \*These authors contributed equally.

20 ‡ These authors jointly supervised this work.

21 Corresponding should be addressed to Fei Wang ([wangfei@biomed.au.dk](mailto:wangfei@biomed.au.dk)), and  
22 Yonglun Luo ([alun@biomed.au.dk](mailto:alun@biomed.au.dk)).

23

24

25

26

27

28

29

30

31 **Supplementary Figure 1:**

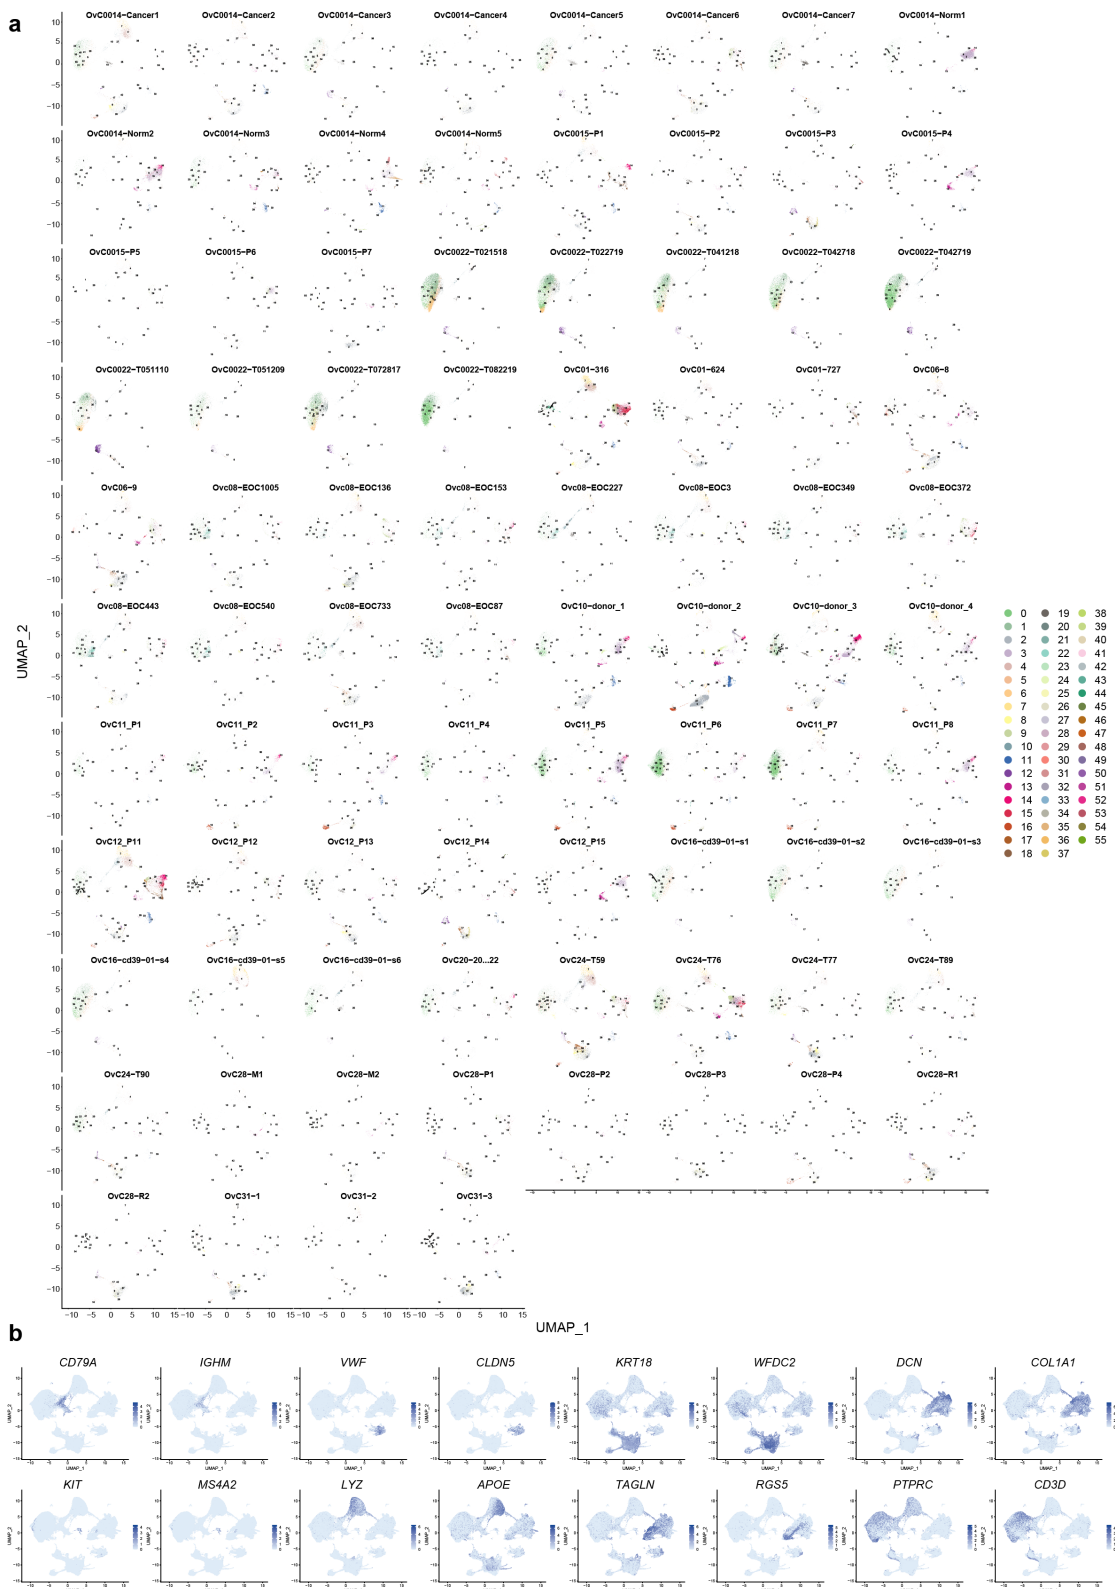

32

33 **a** The UMAP plot is separated by patient samples, with colors indicate different clusters.

34 **b** The UMAP plot color coded for the expression of marker genes for major cell type.

35

36 **Supplementary Figure 2:**

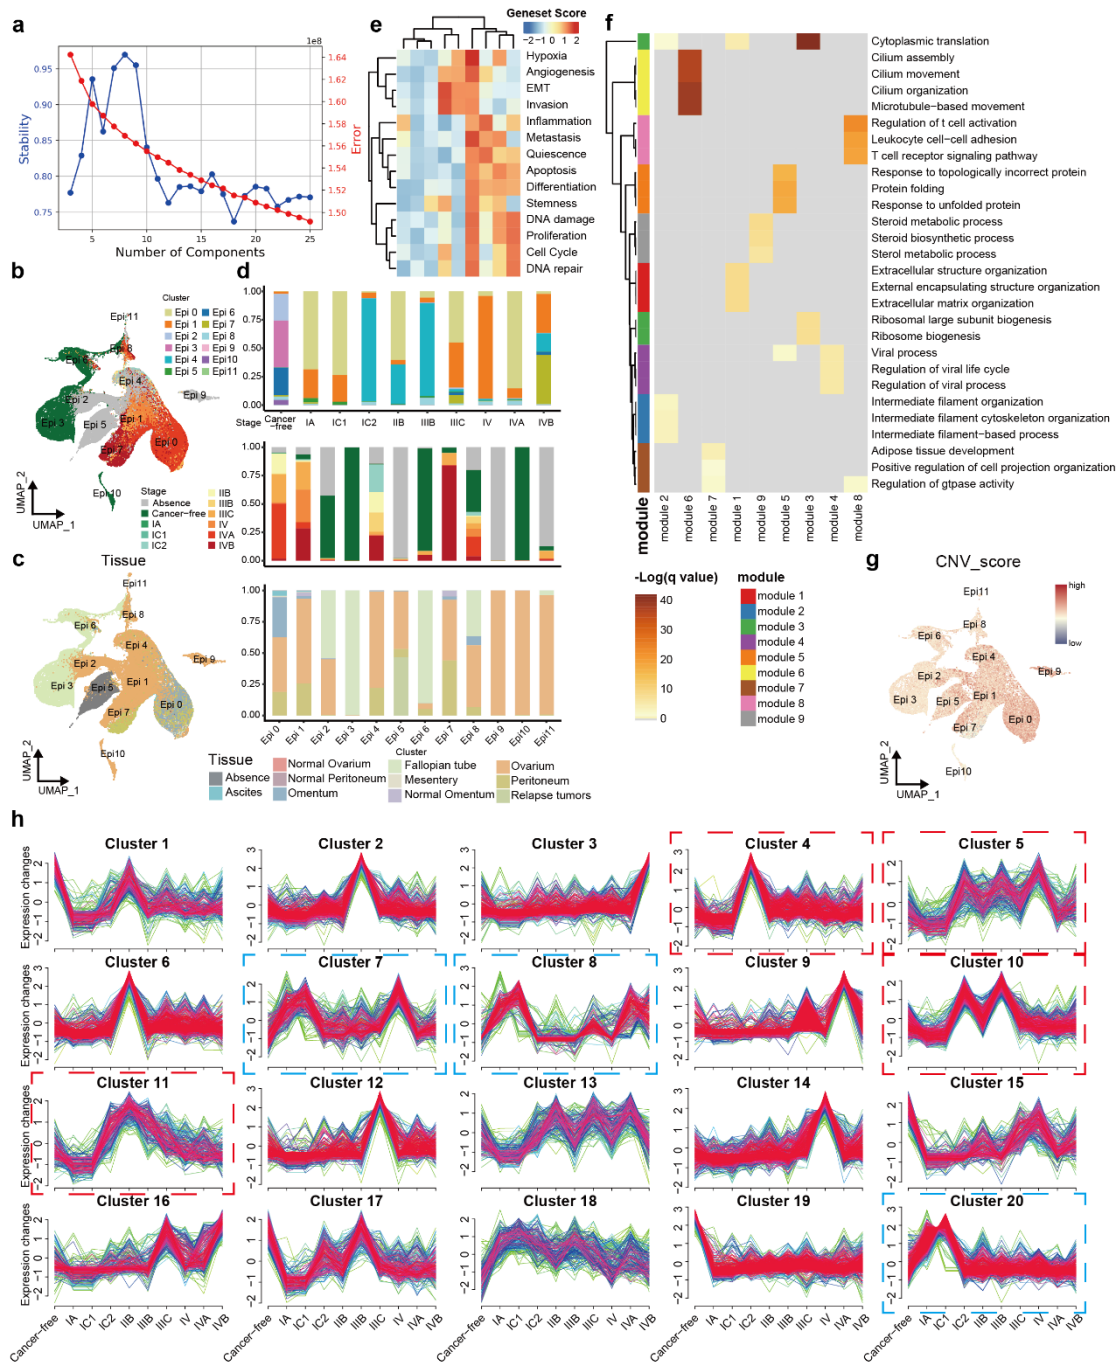

37

38 **a** The curve chart shows the stability and error of different quantity of gene module. **b**  
 39 The UMAP plot shows different stages of the epithelial cell by color. **c** The UMAP plot  
 40 shows different tissues of the epithelial cell by color. **d** Stacked bar graph of the  
 41 proportion of epithelial cell cluster in each stage and the proportion of stage and tissue  
 42 in each epithelial cell sub cluster. **e** Heat map show the GSVA scores of cancer-related  
 43 function gene sets for each gene module. **f** Heat map show the GO enrichment terms of  
 44 the top 200 contribution genes of each gene module. **g** The UMAP plot shows CNV

---

45 score of the epithelial cell by color. h Clustering analysis based on similar temporal  
46 patterns of high variation genes in epithelial cells.

47

48

49 **Supplementary Figure 3:**

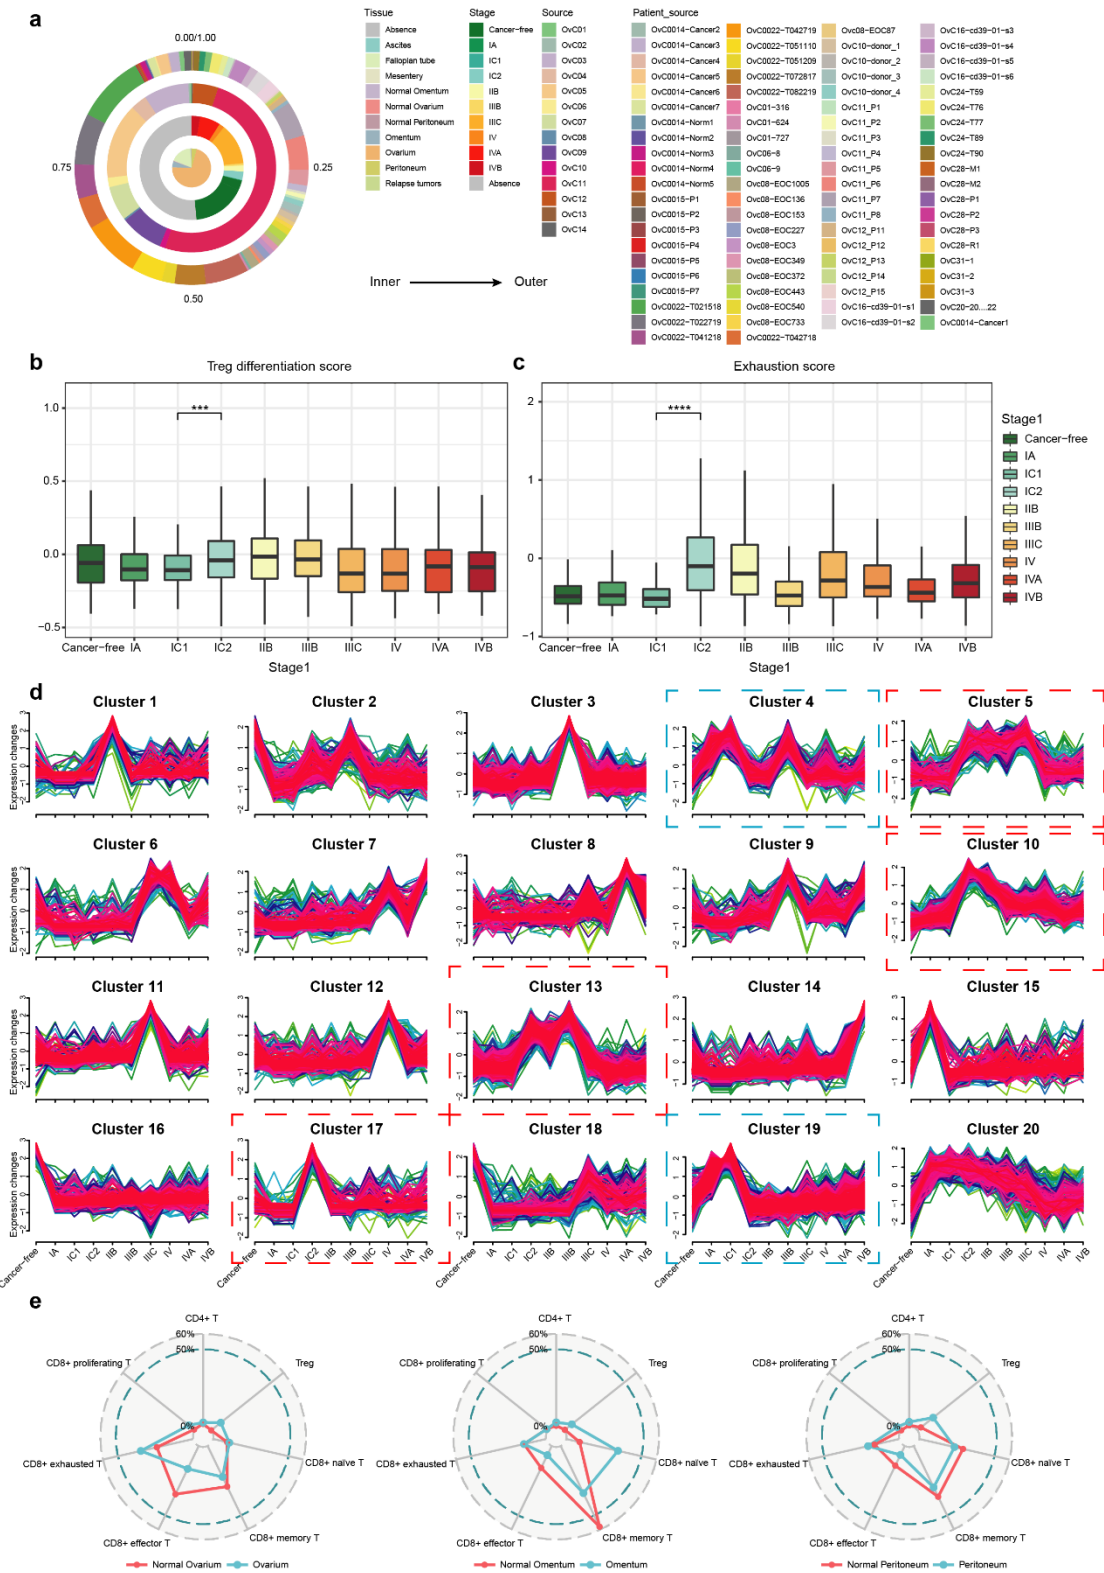

50  
 51 **a** The donut diagram shows the different tissue, stage, source, patient sample  
 52 composition of the T cell. **b** The box plot shows change of Treg differentiation score in  
 53 T cell with stage (Total 35,499 single cells). **c** The box plot shows change of exhaustion

---

54 differentiation score in T cell with stage (Total 35,499 single cells). \*,  $P < 0.05$ ; \*\*,  $P <$   
55  $0.01$ ; \*\*\*,  $P < 0.001$ , \*\*\*\*,  $P < 0.0001$ . **d** Clustering analysis based on similar temporal  
56 patterns of high variation genes in T cells. **e** The radar map shows changes in the  
57 proportion of T cell subtypes in ovarium, omentum, peritoneum versus normal tissue.  
58 The red dashed box indicates increase from stage IC1 to stage IC2, and the blue dashed  
59 box indicates a decrease.  
60  
61

62 **Supplementary Figure 4:**

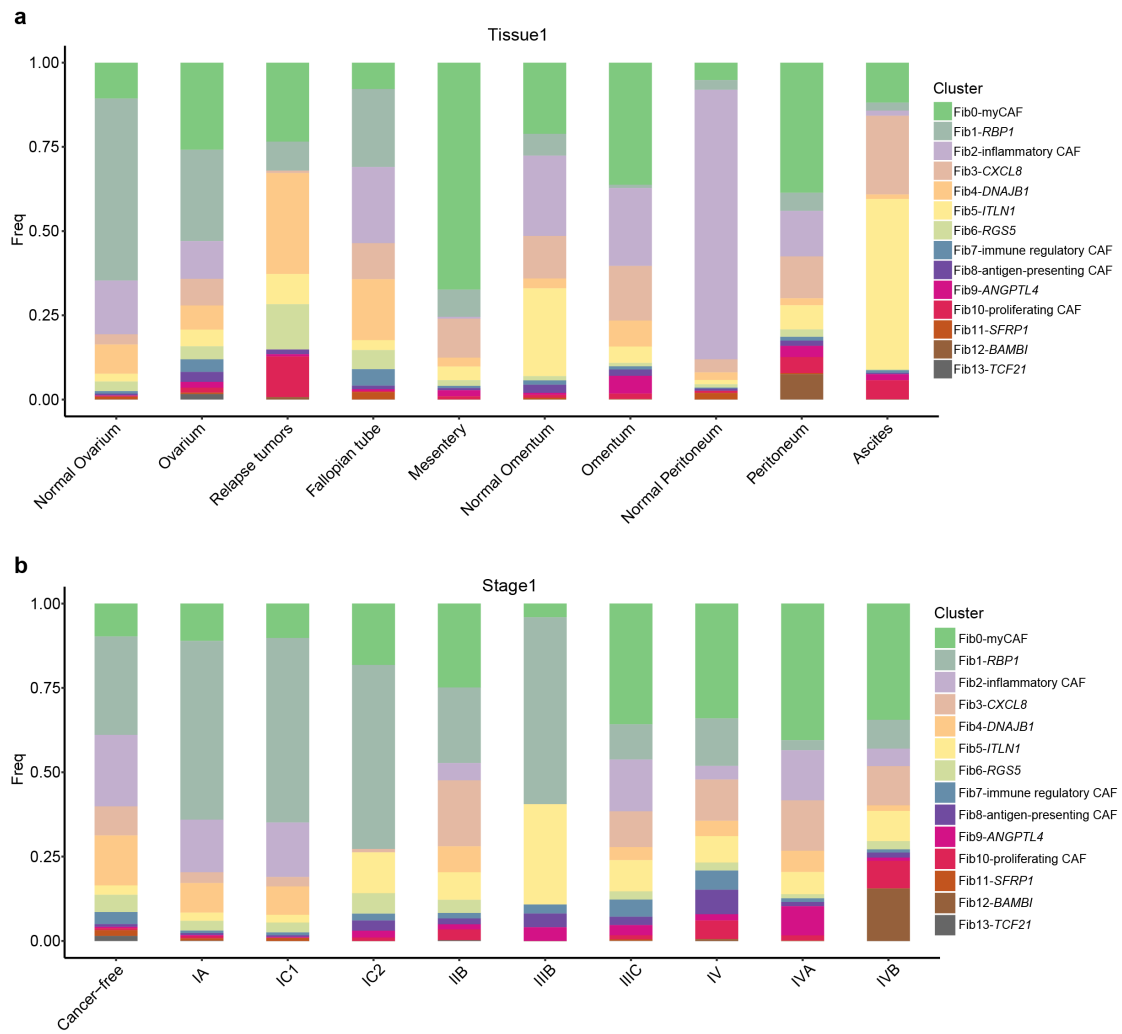

63

64 **a** Stacked bar graph of the proportion of fibroblast subtypes in each tissue. **b** Stacked

65 bar graph of the proportion of fibroblast subtypes in each stage.

66

67

68 **Supplementary Figure 5:**

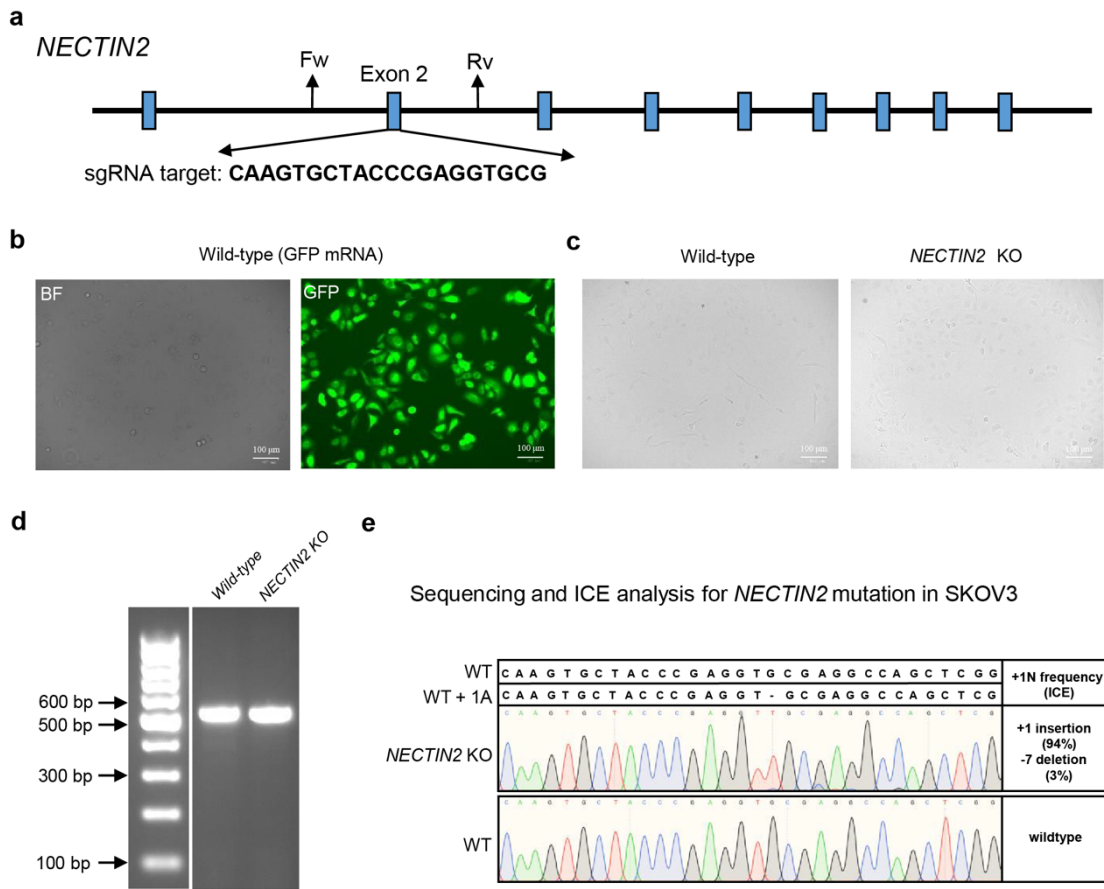

69

70 **a** sgRNA targeting exon 2 of the *NECTIN2* gene and primers sites. **b** EGFP mRNA  
71 transduction efficiency in SKOV3 cells. **c** Cell morphology of SKOV3 and *NECTIN2*  
72 knock-out SKOV3 cells. **d** Gel images of PCR amplicons for wildtype and *NECTIN2*  
73 knock out target regions. **e** Sequences and ICE analysis for *NECTIN2* mutation in  
74 SKOV3 cells.



---
