# Supplementary material for: Single-cell transcriptome analysis of epithelial, immune, and stromal signatures and interactions in human ovarian cancer
Source: PubMed Central journal article supplement (PMC10817929; doi:10.1038/s42003-024-05826-1), 2024-01-26
Supplement: 42003_2024_5826_MOESM3_ESM.pdf [file 42003_2024_5826_MOESM3_ESM.pdf]

## Description of Additional Supplementary Files

**File name:** Supplementary Data 1

**Description:** Literature collection and summary and the source data of Figure 1.

**File name:** Supplementary Data 2

**Description:** The source data of Figure 2.

**File name:** Supplementary Data 3

**Description:** T cell exhaustion and regulatory T cell differentiation gene set.

**File name:** Supplementary Data 4

**Description:** The source data of Figure 4.

**File name:** Supplementary Data 5

**Description:** The source data of Figure 5.

**File name:** Supplementary Data 6

**Description:** Nectin 2 sgRNA and Oligo sequences.
